# Supplementary material for: The synthesis of FeCoS2 and an insight into its physicochemical performance
Source: Royal Society of Chemistry journal article supplement (doi:10.1039/c8ce00299a), 2018-01-01
Supplement: c8ce00299a1.pdf [file c8ce00299a1.pdf]

## Supporting Information

### Morphology-dependent physicochemical performances of FeCoS<sub>2</sub>

Yongjie Zhao\*, Jialin Liu, Caihua Ding, Chengzhi Wang, Ximei Zhai, Jingbo Li and Haibo Jin

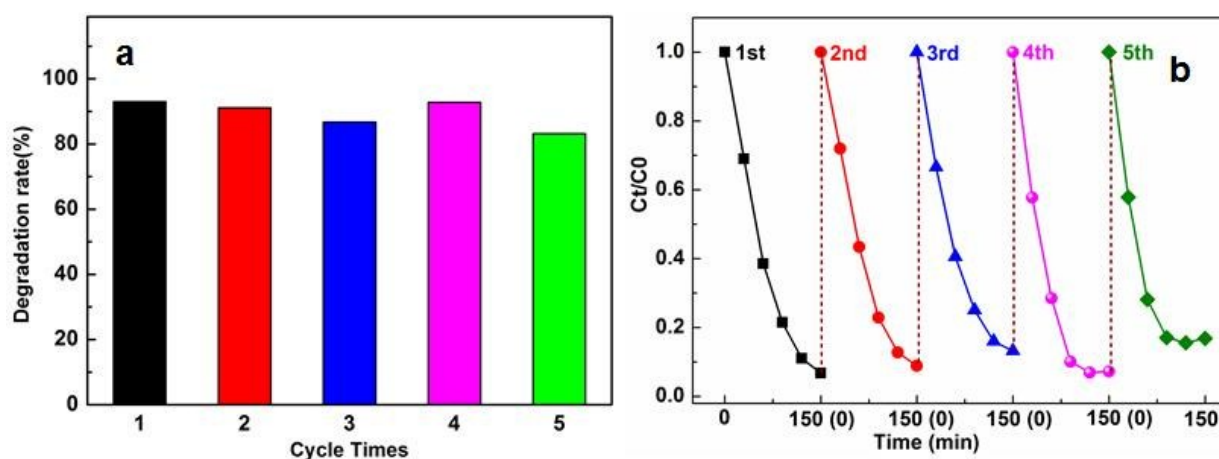

**Fig. S1.** (a) The histogram of degradation rate percentage at different cycle times; (b) Degradation rate of FeCoS<sub>2</sub>-190 °C sample for MB dye at different cycles.

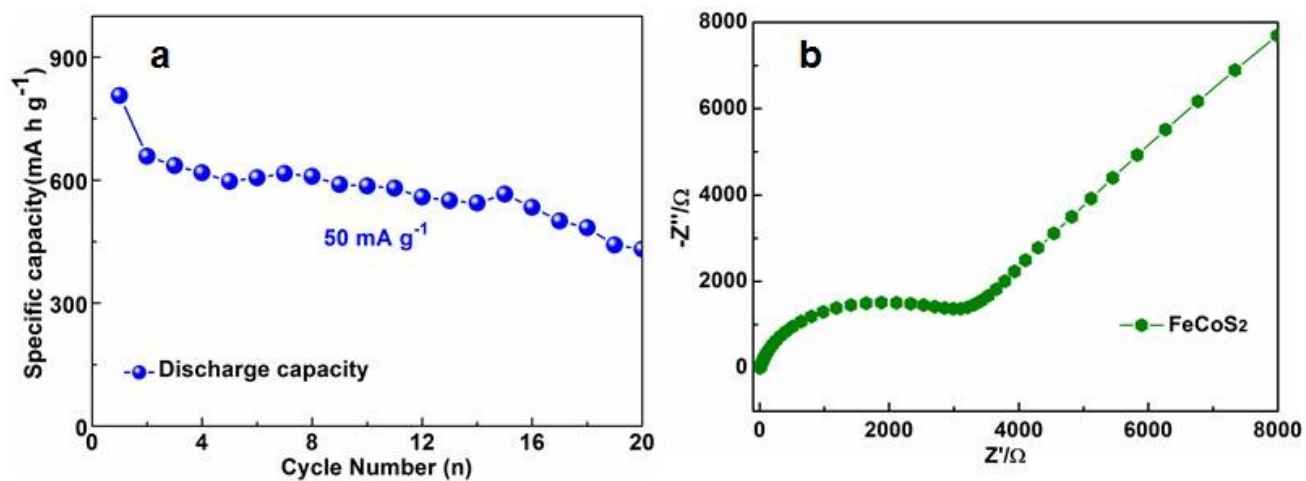

**Fig. S2.** Electrochemical performance of Na/FeCoS<sub>2</sub> half-cells: (a) Cyclic performance at a current density of 50 mA g<sup>-1</sup>. (b) Nyquist plots before cycling.
